# Supplementary material for: Constructing the Schizophrenia Recognition Method Employing GLCM Features from Multiple Brain Regions and Machine Learning Techniques
Source: MDPI journal article supplement (doi:10.3390/diagnostics13132140), 2023-06-22
Supplement: s1 [file s1]

**Table S1.** GLCM Texture Features

| Features                     | Definitions                                                                          |
|------------------------------|--------------------------------------------------------------------------------------|
| Autocorrelation              | $\sum_{i=0}^N \sum_{j=0}^N (i * j) * P(i, j))$                                       |
| Cluster prominence           | $\sum_{i=0}^N \sum_{j=0}^N (i + j - 2\mu)^3 * P(i, j))$                              |
| Cluster shade                | $\sum_{i=0}^N \sum_{j=0}^N (i + j - 2\mu)^4 * P(i, j))$                              |
| Contrast                     | $\sum_{i=0}^N \sum_{j=0}^N ((i - j)^2 P(i, j))$                                      |
| Correlation1                 | $\frac{\sum_{i=0}^N \sum_{j=0}^N ((i, j) P(i, j)) - M_x M_y}{\sigma_x \sigma_y}$     |
| Correlation2                 | $\frac{\sum_{i=0}^N \sum_{j=0}^N (i - \mu_x)(j - \mu_y) P(i, j)}{\sigma_x \sigma_y}$ |
| Difference entropy           | $- \sum_{k=0}^{N-1} P_{x-y}(i) \log (P_{x-y}(k))$                                    |
| Difference variance          | $\sum_{k=0}^{N-1} (k - \mu_{x-y})^2 P_{x-y}(k)$                                      |
| Dissimilarity                | $\sum_{i=0}^N \sum_{j=0}^N  i - j  * P(i, j))$                                       |
| Energy                       | $\sum_{x=0}^N \sum_{y=0}^N (P^2(i, j))$                                              |
| Entropy                      | $\sum_{i=0}^N \sum_{j=0}^N p(i, j) \log (P(i, j))$                                   |
| Homogeneity1                 | $\sum_{i=0}^N \sum_{j=0}^N \frac{1}{1 + (i - j)^2} * P(i, j)$                        |
| Homogeneity2                 | $\sum_i \sum_j \frac{1}{1 +  i - j } * P(i, j)$                                      |
| Maximum probability          | $Max_{i,j} P(i, j)$                                                                  |
| Sum average                  | $\sum_{k=0}^{2N-2} k P_{x+y}^{(k)}$                                                  |
| Sum entropy                  | $- \sum_{k=0}^{2N-2} P_{x+y}(k) \log (P_{x+y}(k))$                                   |
| Sum of squares<br>(Variance) | $\sum_{i=0}^N \sum_{j=0}^N (k - \mu)^2 P(i, j)$                                      |
| Sum variance                 | $\sum_{k=2}^{2N} (k - \mu_{x+y})^2 P_{x+y}^{(k)}$                                    |

|                                      |                                                                 |
|--------------------------------------|-----------------------------------------------------------------|
| Information measure of correlation1  | $\frac{HXY - HXY1}{\text{Max}(HX, HY)}$                         |
| Information measure of correlation2  | $\sqrt{(1 - \exp[-2(HXY2 - HXY)])}$                             |
| Inverse difference                   | $\sum_{i=0}^N \sum_{j=0}^N \frac{P(i, j)}{1 +  i - j }$         |
| Inverse difference normalized (INN)  | $\sum_{k=0}^{N_g-1} \frac{P_{i-y}(k)}{1 + (\frac{k}{N_g})}$     |
| Inverse difference moment normalized | $\sum_{k=0}^{N_g-1} \frac{P_{i-y}(k)}{1 + (\frac{k^2}{N_g^2})}$ |
| Kurtosis                             | $\frac{1}{m * n} \times \frac{\sum (P(i, j) - M)^4}{SD^4}$      |
| Skewness                             | $\frac{1}{m * n} \times \frac{\sum (P(i, j) - M)^3}{SD^3}$      |
| Maximal correlation coefficient      | $\sum_k \frac{P(i, k)P(j, k)}{P_x(i)P_y(j)}$                    |
| Mean                                 | $\frac{1}{N_g^2} \sum_i \sum_j P(i, j)$                         |

1. Soh, L-K, and Costas Tsatsoulis. "Texture Analysis of Sar Sea Ice Imagery Using Gray Level Co-Occurrence Matrices." IEEE Transactions on geoscience and remote sensing 37, no. 2 (1999): 780-95.
2. Haralick, Robert M, Karthikeyan Shanmugam, and Its' Hak Dinstein. "Textural Features for Image Classification." IEEE Transactions on systems, man, and cybernetics, no. 6 (1973): 610-21.
3. Clausi, David A. "An Analysis of Co-Occurrence Texture Statistics as a Function of Grey Level Quantization." Canadian Journal of remote sensing 28, no. 1 (2002): 45-62.
4. Balakumar, B, Raviraj, P, Divya Devi, E. "Brain Tumor Classification Using Machine Learning Algorithms", Elysium Journal of Engineering Research and Management, (2016): 4 (2).
